# Supplementary material for: Snow melt response to simulated warming across a large elevation gradient, southern Sierra Nevada, California
Source: Copernicus journal article supplement (doi:10.5194/tc-2017-123), 2017-07-18
Supplement: Supplementary file 1 [file tc-2017-123-supplement.pdf]

Supporting Information for

## **Snowmelt response to simulated warming across a large elevation gradient, southern Sierra Nevada, California**

Keith N. Musselman<sup>1</sup>, Noah P. Molotch<sup>2</sup>, and Steven A. Margulis<sup>3</sup>

1 National Center for Atmospheric Research, Boulder, Colorado, USA

2 Department of Geography, Institute of Arctic and Alpine Research, University of Colorado, Boulder, USA & Jet Propulsion Laboratory, California Institute of Technology, Pasadena, USA

3 Department of Civil and Environmental Engineering, University of California, Los Angeles, California, USA

### **Contents of this file**

Figure S1  
Tables S1 to S4

### **Introduction**

Figure S1 includes an analysis of model SWE RMSE computed on measured values from monthly snow courses at seven sites at different elevations. The analysis shows that more of the model error is explained by the distance of a grid element from the nearest precipitation gauge used to force the model than by elevation alone. Table S1 presents how the three snow years of the study compare to the climatological average SWE observations at local automated snow pillows. Tables S2 and S3 show comparisons of modeled and measured snowpack for the basin-scale surveys (Table S2) and monthly snow course surveys (Table S3). Table S4 provides the model simulated total meltwater volume and the relative atmospheric loss over the model domain for each model run.

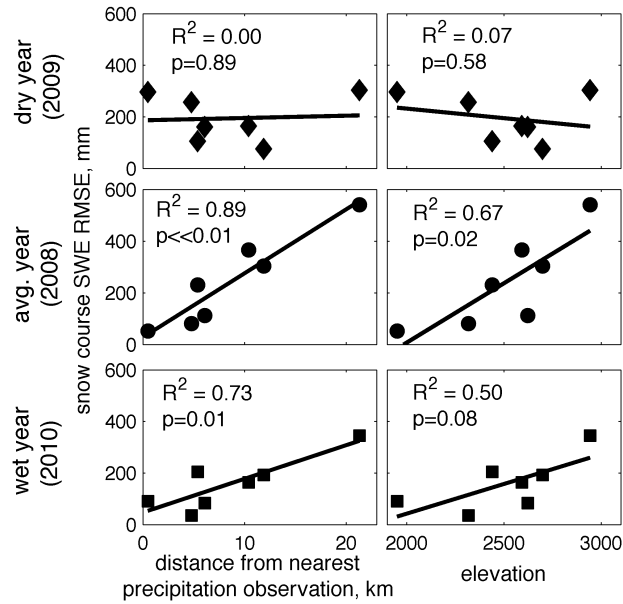

Figure S1: Linear regression relationships (lines;  $R^2$  and p-values) between model SWE RMSE (y-axes) computed on measured values from monthly snow courses at seven sites (markers; see Figure 1) and (left panels) the linear distance of each snow course from the nearest precipitation measurement station used to force the model (x-axes) and (right panels) the snow course elevation (x-axes) for each of the three water years (panel rows). Table S4 includes the measured and modeled snow course SWE data.

| Water year | Giant Forest (1951 m) | Big Meadows (2317 m) | Farewell Gap (2896 m) | Three-station mean |
|------------|-----------------------|----------------------|-----------------------|--------------------|
| 2008       | +22 mm (+17%)         | incomplete record    | -14 mm (-3%)          | +4 mm (+7%)        |
| 2009       | -18 mm (-16%)         | -53 mm (-20%)        | -158 mm (-34%)        | -76 mm (-23%)      |
| 2010       | +118 mm (+114%)       | +89 mm (+34%)        | +66 mm (+14%)         | +91 mm (+54%)      |

Table S1. Differences, in mm and percent, between the seasonal average SWE measured at the three automated snow stations and the climatological average SWE based on 26-years of data (1988 – 2014) collected at the Giant Forest and Big Meadows stations and a 15-year record (2000 – 2014) at the Farewell Gap station.

| Snow survey results                          | Wolverton basin (forested)          |                                     |                                     | Tokopah basin (alpine)            |                                     |                                     |
|----------------------------------------------|-------------------------------------|-------------------------------------|-------------------------------------|-----------------------------------|-------------------------------------|-------------------------------------|
| <b>2008</b>                                  | <i>Feb.</i>                         | <i>Mar.</i>                         | <i>Apr.</i>                         | <i>Mar.</i>                       | <i>Apr.</i>                         | <i>May</i>                          |
| survey date                                  | 17 <sup>th</sup> – 18 <sup>th</sup> | 23 <sup>rd</sup> – 24 <sup>th</sup> | 27 <sup>th</sup> – 28 <sup>th</sup> | -                                 | 10 <sup>th</sup> – 13 <sup>th</sup> | -                                   |
| # of depth waypoints <sup>N</sup>            | 112                                 | 85                                  | 111                                 | -                                 | 252                                 | -                                   |
| mean depth, cm                               | 190                                 | 190                                 | 115                                 | -                                 | 202                                 | -                                   |
| standard deviation, cm                       | 30                                  | 37                                  | 58                                  | -                                 | 88                                  | -                                   |
| maximum depth, cm                            | 253                                 | 353                                 | 314                                 | -                                 | 523                                 | -                                   |
| # of density snow pits                       | 2                                   | 2                                   | 3                                   | -                                 | 2                                   | -                                   |
| mean density, $\pm$ std., kg m <sup>-3</sup> | 364 $\pm$ 24                        | 399 $\pm$ 12                        | 439 $\pm$ 12                        | -                                 | 445 $\pm$ 65                        | -                                   |
| mean SWE, $\pm$ std., mm                     | 691 $\pm$ 134                       | 758 $\pm$ 170                       | 544 $\pm$ 284                       | -                                 | 1000 $\pm$ 476                      | -                                   |
| model SWE RMSE, mm                           | 146                                 | 285                                 | 276                                 | -                                 | 539                                 | -                                   |
| model SWE bias, mm                           | 88 $\pm$ 117                        | 229 $\pm$ 171                       | 43 $\pm$ 274                        | -                                 | 313 $\pm$ 440                       | -                                   |
| normalized MSE                               | 0.04                                | 0.13                                | 0.24                                | -                                 | 0.21                                | -                                   |
| <b>2009</b>                                  | <i>Feb.</i>                         | <i>Mar.</i>                         | <i>Apr.</i>                         | <i>Mar.</i>                       | <i>Apr.</i>                         | <i>May</i>                          |
| survey date                                  | 14 <sup>th</sup> – 15 <sup>th</sup> | 21 <sup>st</sup> – 22 <sup>nd</sup> | 25 <sup>th</sup> – 26 <sup>th</sup> | 1 <sup>st</sup> – 2 <sup>nd</sup> | 9 <sup>th</sup> – 12 <sup>th</sup>  | 13 <sup>th</sup> – 16 <sup>th</sup> |
| # of depth waypoints <sup>N</sup>            | 85                                  | 95                                  | 109                                 | 160                               | 183                                 | 183                                 |
| mean depth, cm                               | 156                                 | 122                                 | 81                                  | 219                               | 213                                 | 117                                 |
| standard deviation, cm                       | 34                                  | 35                                  | 46                                  | 57                                | 95                                  | 79                                  |
| maximum depth, cm                            | 242                                 | 199                                 | 179                                 | 405                               | 484                                 | 393                                 |
| # of density snow pits                       | 3                                   | 2                                   | 2                                   | 2                                 | 3                                   | 4                                   |
| mean density, $\pm$ std., kg m <sup>-3</sup> | 262 $\pm$ 9                         | 333 $\pm$ 30                        | 415 $\pm$ 5                         | 302 $\pm$ 6                       | 372 $\pm$ 57                        | 435 $\pm$ 30                        |
| mean SWE, $\pm$ std., mm                     | 408 $\pm$ 100                       | 405 $\pm$ 130                       | 691 $\pm$ 134                       | 659 $\pm$ 207                     | 849 $\pm$ 401                       | 508 $\pm$ 366                       |
| model SWE RMSE, mm                           | 102                                 | 181                                 | 227                                 | 193                               | 390                                 | 352                                 |
| model SWE bias, mm                           | -47 $\pm$ 91                        | 127 $\pm$ 129                       | 52 $\pm$ 222                        | 83 $\pm$ 175                      | 113 $\pm$ 375                       | 121 $\pm$ 332                       |
| normalized MSE                               | 0.07                                | 0.15                                | 0.40                                | 0.18                              | 0.18                                | 0.66                                |
| <b>2010</b>                                  | <i>Feb.</i>                         | <i>Mar.</i>                         | <i>Apr.</i>                         | <i>Mar.</i>                       | <i>Apr.</i>                         | <i>May</i>                          |
| survey date                                  | -                                   | -                                   | -                                   | -                                 | 2 <sup>nd</sup> – 3 <sup>rd</sup>   | -                                   |
| # of depth waypoints <sup>N</sup>            | -                                   | -                                   | -                                   | -                                 | 119                                 | -                                   |
| mean depth, cm                               | -                                   | -                                   | -                                   | -                                 | 281                                 | -                                   |
| standard deviation, cm                       | -                                   | -                                   | -                                   | -                                 | 63                                  | -                                   |
| maximum depth, cm                            | -                                   | -                                   | -                                   | -                                 | 532                                 | -                                   |
| # of density snow pits                       | -                                   | -                                   | -                                   | -                                 | 1                                   | -                                   |
| mean density, $\pm$ std., kg m <sup>-3</sup> | -                                   | -                                   | -                                   | -                                 | 450.6                               | -                                   |
| mean SWE, $\pm$ std., mm                     | -                                   | -                                   | -                                   | -                                 | 1265 $\pm$ 310                      | -                                   |
| model SWE RMSE, mm                           | -                                   | -                                   | -                                   | -                                 | 295                                 | -                                   |
| model SWE bias, mm                           | -                                   | -                                   | -                                   | -                                 | 24 $\pm$ 295                        | -                                   |
| normalized MSE                               | -                                   | -                                   | -                                   | -                                 | 0.05                                | -                                   |

<sup>N</sup> At each waypoint, three snow depth measurements separated by five meters were made in north-south directions.

Table S2. Summary statistics of the Wolverton and Tokopah basin snow surveys in 2008, 2009, and 2010. Missing data (-) values indicate no survey was conducted on that date.

| year | month | Monthly snow course sites ranked by elevation |              |              |              |              |              |              |
|------|-------|-----------------------------------------------|--------------|--------------|--------------|--------------|--------------|--------------|
|      |       | #1<br>1951 m                                  | #2<br>2317 m | #3<br>2439 m | #4<br>2592 m | #5<br>2622 m | #6<br>2698 m | #7<br>2942 m |
| 2008 | Feb.  | 295 (353)                                     | 668 (582)    | -            | -            | -            | 505 (731)    | 493 (813)    |
|      | Mar.  | 607 (550)                                     | 879 (878)    | 762 (1034)   | 533 (1077)   | 1245 (1093)  | -            | -            |
|      | Apr.  | 493 (429)                                     | 802 (691)    | 714 (904)    | 945 (1093)   | 1115 (1147)  | 808 (1174)   | 620 (1314)   |
|      | May   | 20 (34)                                       | -            | 155 (376)    | 643 (1147)   | 889 (1006)   | -            | -            |
| 2009 | Feb.  | 348 (129)                                     | 224 (122)    | 279 (192)    | -            | 404 (343)    | 284 (341)    | 239 (505)    |
|      | Mar.  | 582 (240)                                     | 516 (272)    | 373 (402)    | -            | 826 (581)    | -            | -            |
|      | Apr.  | 455 (127)                                     | 513 (158)    | 368 (304)    | 554 (616)    | 861 (684)    | 599 (687)    | 554 (890)    |
|      | May   | 279 (0)                                       | -            | 198 (20)     | 312 (535)    | 732 (645)    | -            | -            |
| 2010 | Feb.  | 450 (411)                                     | 495 (527)    | 432 (550)    | -            | 638 (587)    | 476 (594)    | 467 (652)    |
|      | Mar.  | 640 (614)                                     | 757 (802)    | 724 (836)    | 671 (876)    | 965 (888)    | -            | -            |
|      | Apr.  | 726 (596)                                     | 876 (848)    | 671 (935)    | 892 (1018)   | 1156 (1031)  | 798 (1043)   | 699 (1150)   |
|      | May   | 668 (552)                                     | -            | 653 (920)    | 1128 (1279)  | 1394 (1335)  | -            | -            |

Table S3. Monthly snow course SWE measurements with corresponding modeled SWE (parentheses), in mm of water equivalent, for water years 2008, 2009 and 2010. Snow course numbers (e.g., ‘#3’) correspond to those in Table 1 and Figure 1. Surveys were conducted on the first day of each month. Missing data values (-) indicate no survey was conducted on that date.

| Water<br>year |                             | Nom. | +1°C | +2°C | +3°C | +4°C | +5°C | +6°C |
|---------------|-----------------------------|------|------|------|------|------|------|------|
| 2009          | Total melt, km <sup>3</sup> | 0.84 | 0.75 | 0.66 | 0.56 | 0.49 | 0.39 | 0.32 |
|               | Atmos. loss, %              | 9.3  | 10.0 | 11.0 | 11.9 | 12.4 | 13.1 | 13.6 |
| 2008          | Total melt, km <sup>3</sup> | 1.15 | 1.05 | 0.93 | 0.81 | 0.68 | 0.54 | 0.42 |
|               | Atmos. loss, %              | 6.4  | 6.6  | 6.9  | 7.4  | 8.2  | 9.4  | 10.7 |
| 2010          | Total melt, km <sup>3</sup> | 1.37 | 1.28 | 1.16 | 1.03 | 0.92 | 0.75 | 0.61 |
|               | Atmos. loss, %              | 4.8  | 5.1  | 5.5  | 6.1  | 6.6  | 7.4  | 8.3  |

Table S4. Total meltwater volume (km<sup>3</sup>) and the relative atmospheric loss (%) over the model domain for the moderately dry (2009), average (2008) and moderately wet (2010) snow seasons simulated in the nominal (Nom.) and six perturbed temperature scenarios.
